# Supplementary material for: Knocking Out Chloroplastic Aldolases/Rubisco Lysine Methyltransferase Enhances Biomass Accumulation in Nannochloropsis oceanica under High-Light Stress
Source: MDPI journal article supplement (doi:10.3390/ijms25073756), 2024-03-28
Supplement: s1 [file s1]

**Table S1.** DNA sequences of the primers used in this study.

| <b>Primer for plasmid construction via CRISPR (from 5' to 3')</b> |                                                                         |                                                                         |
|-------------------------------------------------------------------|-------------------------------------------------------------------------|-------------------------------------------------------------------------|
| <b>Primer name</b>                                                | <b>Forward</b>                                                          | <b>Reverse</b>                                                          |
| NoLSMT-KO                                                         | CGACACTCTctgatgagtcggtgaggacgaaacgagtaagctcg<br>tcAGAGTGGGGGATGGGCTTAGg | AAAcTCTCACCCCCTACCCGAATCgacgagcttact<br>cgtttcgtcctcacggactcatcagAGAGTG |
| <b>Primer for mutants screening (from 5' to 3')</b>               |                                                                         |                                                                         |
| <b>Primer name</b>                                                | <b>Forward</b>                                                          | <b>Reverse</b>                                                          |
| NoLSMT-Test                                                       | TTGCTCACTCCTACACCACAGTC                                                 | GGATGTAGACGGCATACTTGGACTTG                                              |
